# Supplementary material for: Preparation of quinazolinones using biosynthesized silver nanoparticles
Source: Royal Society of Chemistry journal article supplement (doi:10.1039/d2ra01629j), 2022-01-01

## Electronic Supplementary Information

### Preparation of quinazolinones using biosynthesized silver nanoparticles

Javad Safaei-Ghomi,<sup>a\*</sup> Yasir Waleed Abdulhameed,<sup>b</sup> Zianos Alisavari,<sup>a</sup> Baram Ahmed Hamah Ameen,<sup>c</sup> Seyyed Mohammad Ebrahimi<sup>a</sup>

<sup>a</sup> Department of Organic Chemistry, Faculty of Chemistry, University of Kashan, Kashan, P.O. Box 87317-51167, I.R. Iran. \*E-mail: safaei@kashanu.ac.ir.

<sup>b</sup> College of Languages & Human Sciences, University of Garmian,

<sup>c</sup> Chemistry Department-College of Science- University of Sulaimaniyah, Sulaimaniyah, Kurdistan Region of Iraq

IR: 4-(4-Chloro-phenyl)-7,7-dimethyl-4,6,7,8-tetrahydro-1*H*,3*H*-quinazoline-2,5-dione (**4a**):

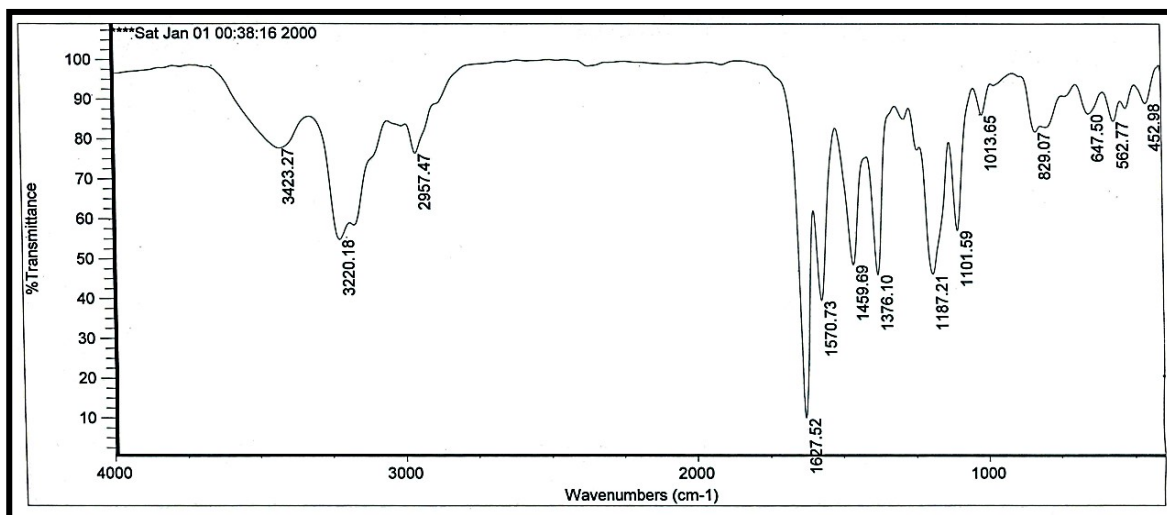

H NMR: 4-(4-Chloro-phenyl)-7,7-dimethyl-4,6,7,8-tetrahydro-1*H*,3*H*-quinazoline-2,5-dione (**4a**):

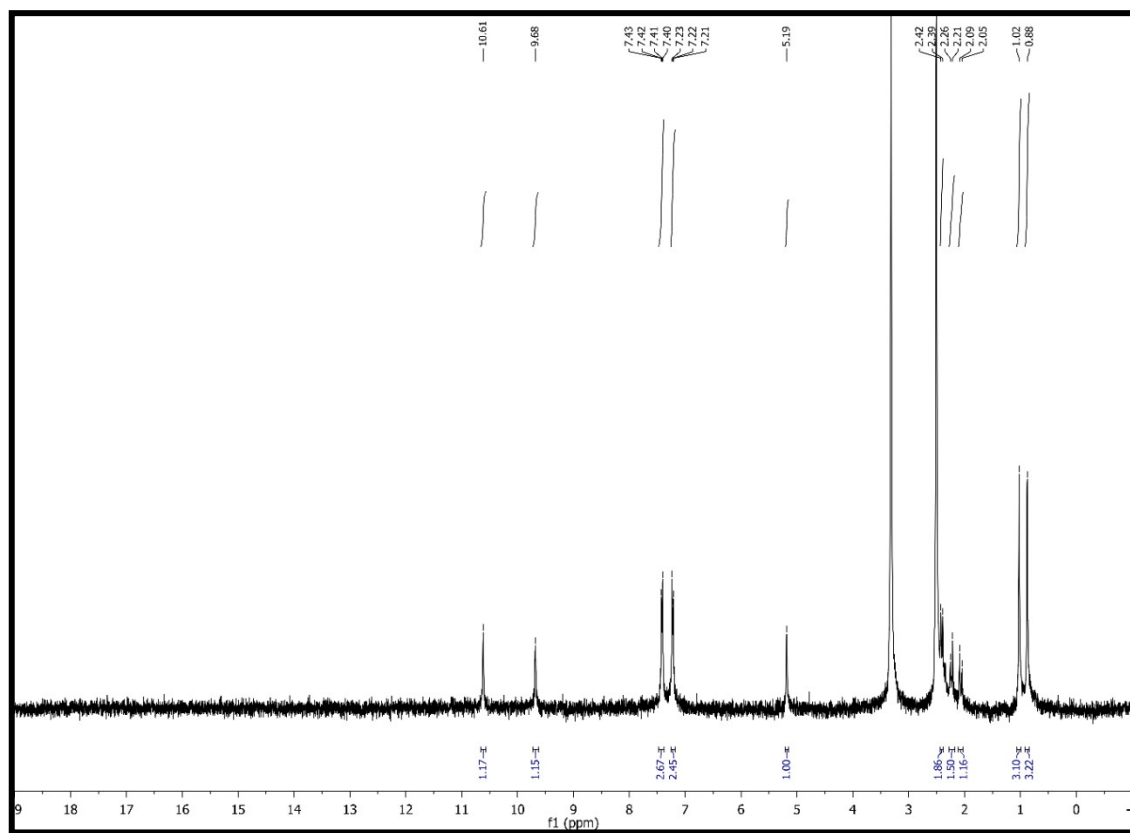

IR: 4-(2-hydroxy-5-bromo-phenyl)-7,7-dimethyl-4,6,7,8-tetrahydro -1H,3H-quinazoline-2,5-dione (**4b**):

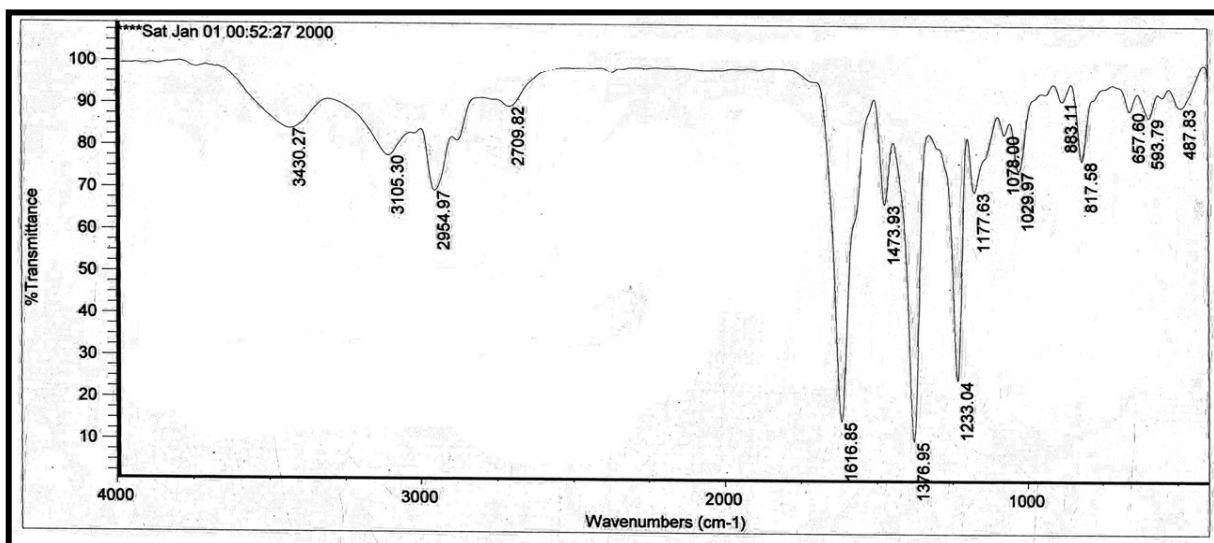

H NMR: 4-(2-hydroxy-5-bromo-phenyl)-7,7-dimethyl-4,6,7,8-tetrahydro -1H,3H-quinazoline-2,5-dione  
(4b):

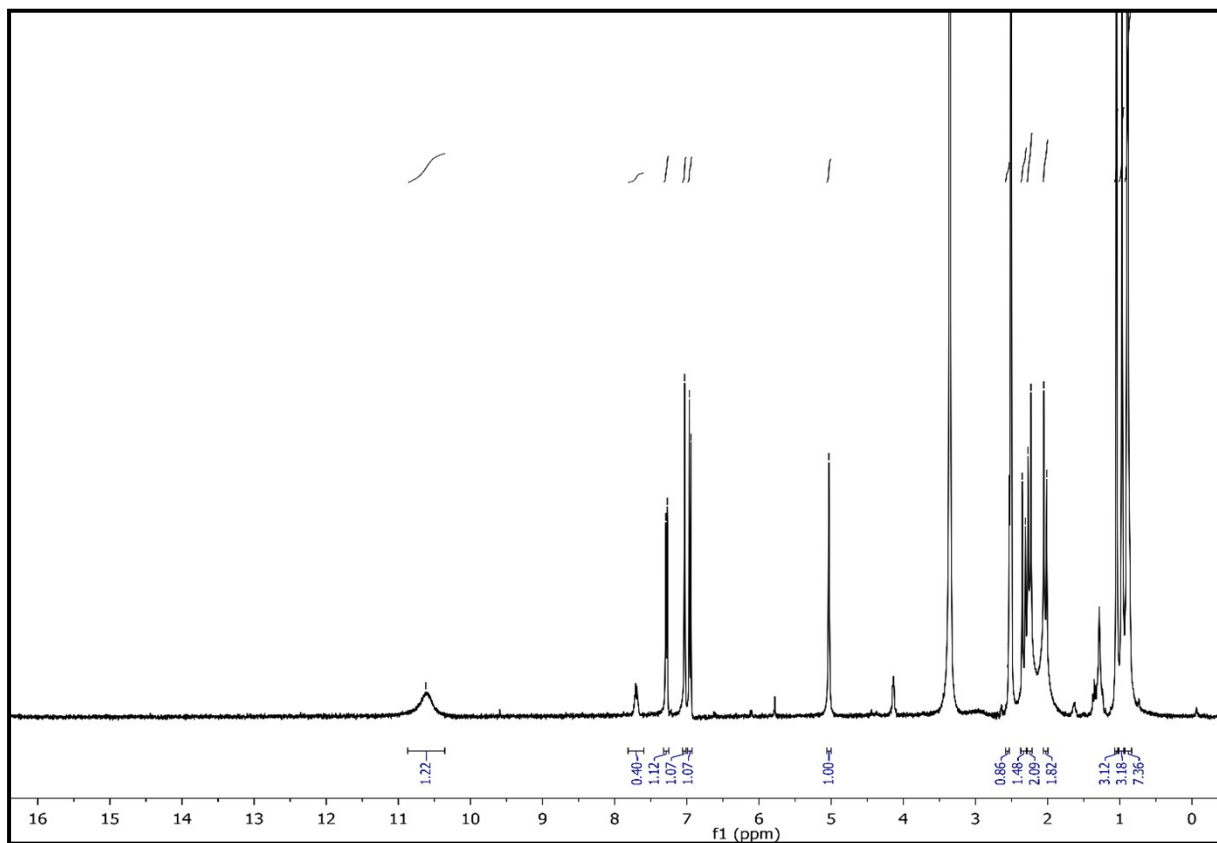

4-(3-nitro-phenyl)-7,7-dimethyl-4,6,7,8-tetrahydro -1H,3H-quinazoline-2,5-dione (4c):

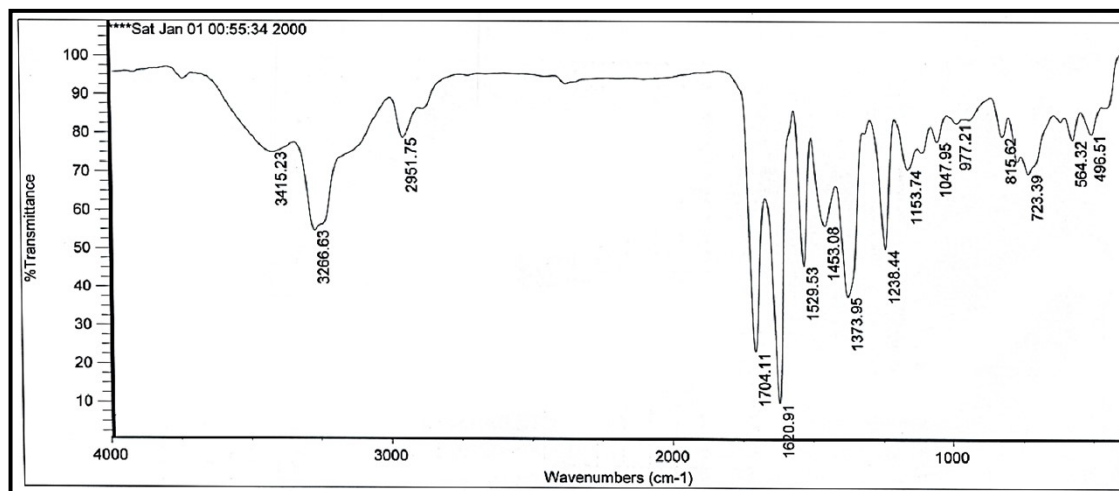

4-(3-nitro-phenyl)-7,7-dimethyl-4,6,7,8-tetrahydro-1H,3H-quinazoline-2,5-dione (4c):

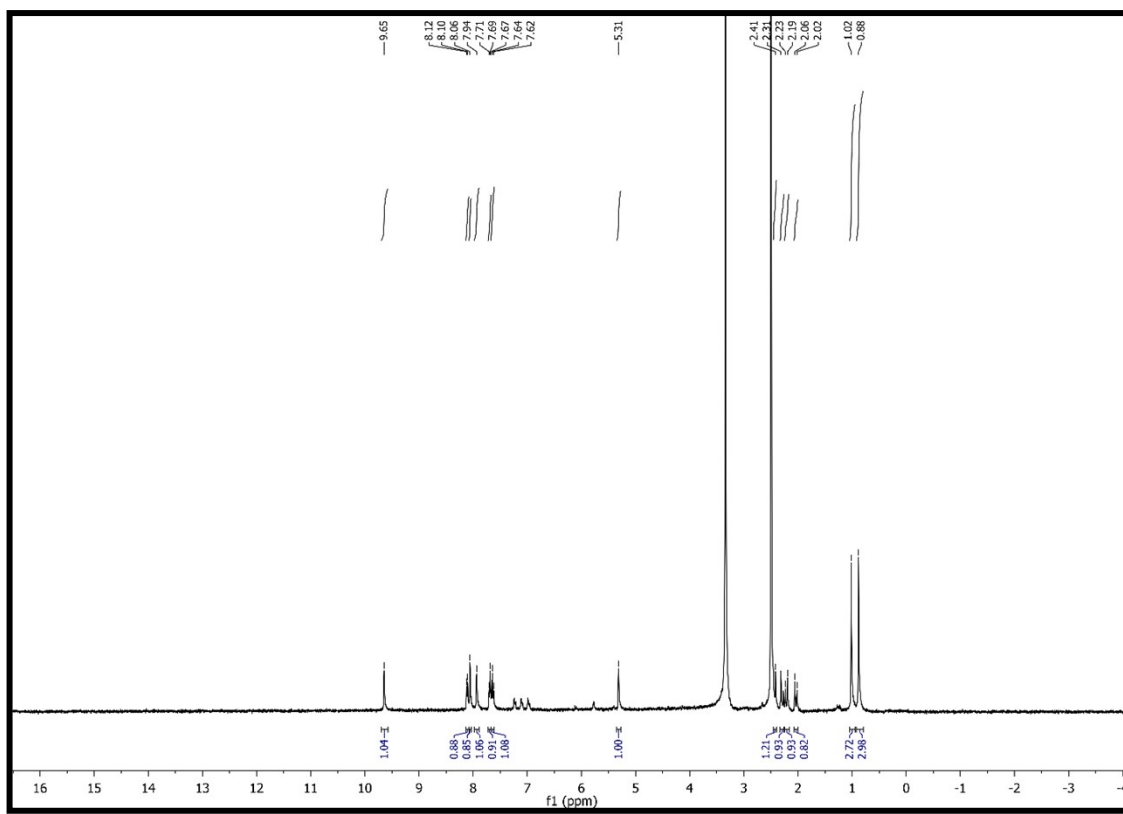

IR: 4-(4-hydroxy-phenyl)-7,7-dimethyl-4,6,7,8-tetrahydro -1H,3H-quinazoline-2,5-dione (4d)

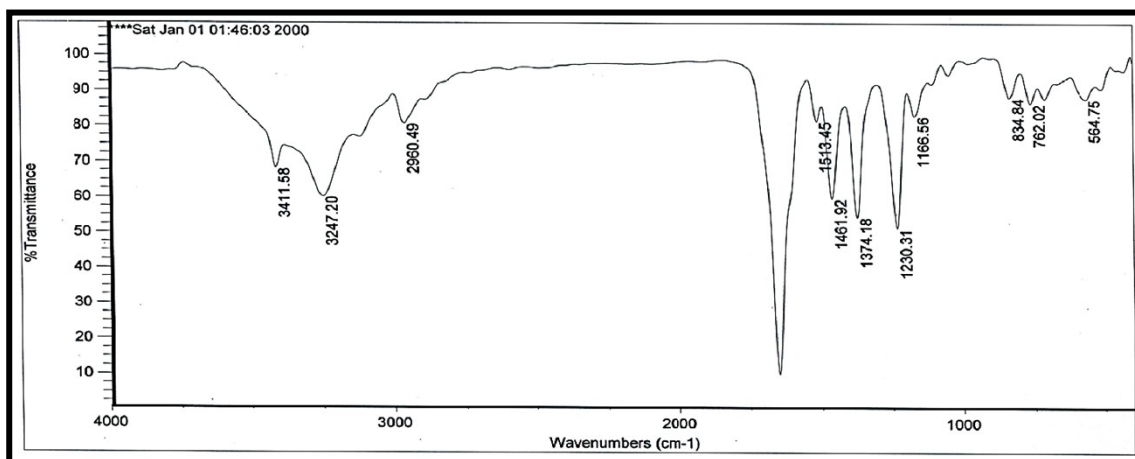



H NMR: 4-(4-hydroxy-phenyl)-7,7-dimethyl-4,6,7,8-tetrahydro -1H,3H-quinazoline-2,5-dione (4d)

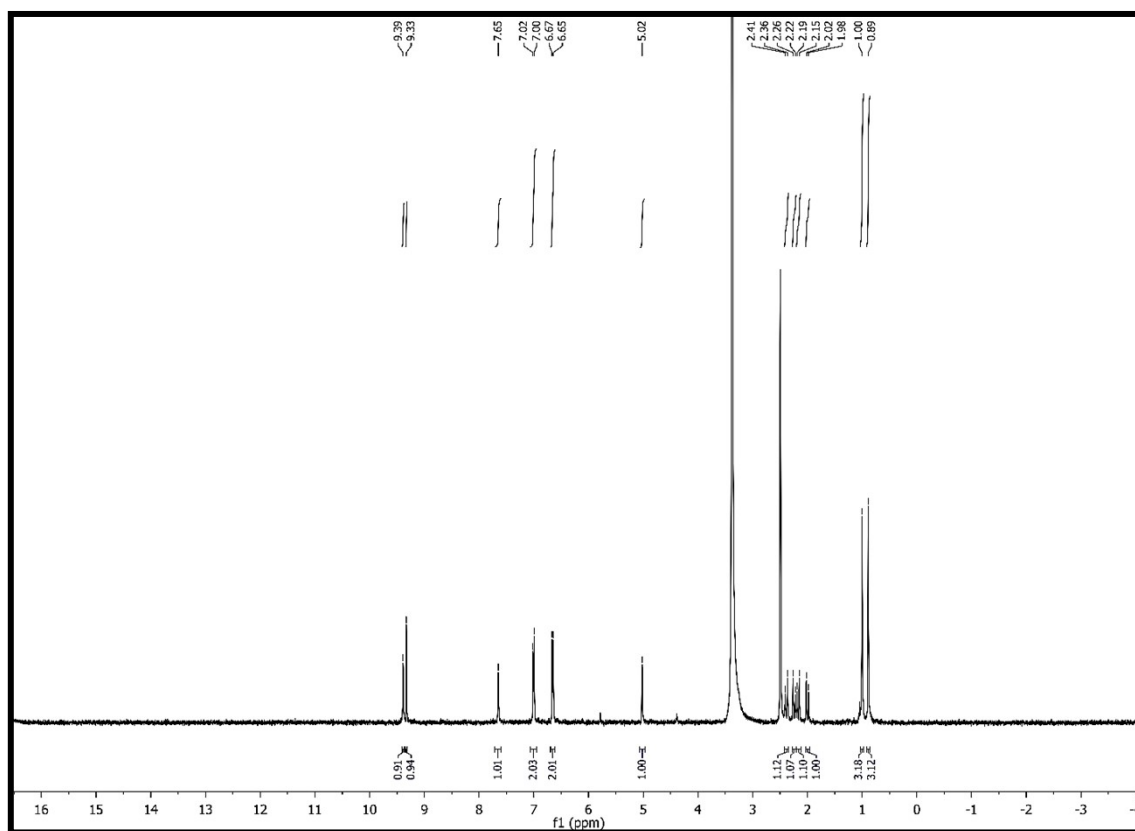

IR: 4-(4-nitro-phenyl)-7,7-dimethyl-4,6,7,8-tetrahydro -1H,3H-quinazoline-2,5-dione (**4e**):

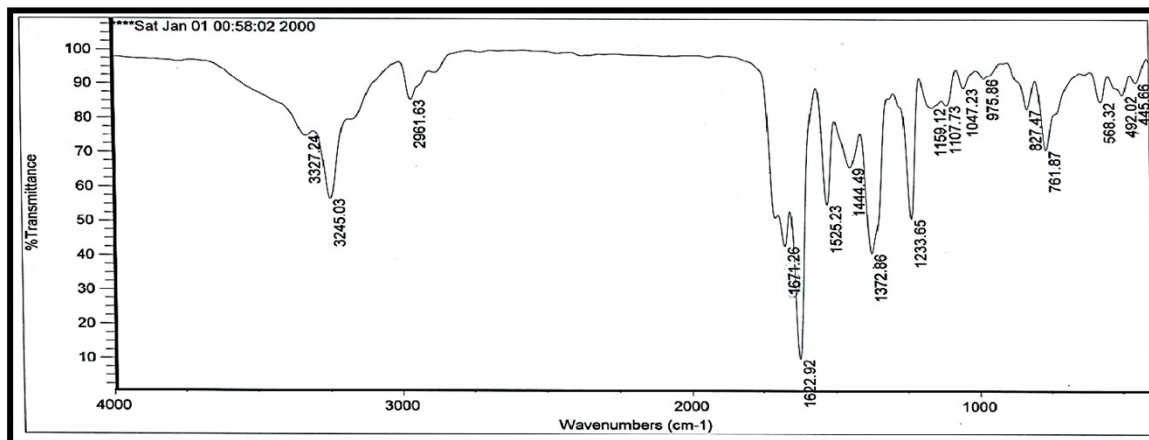

H NMR: 4-(4-nitro-phenyl)-7,7-dimethyl-4,6,7,8-tetrahydro -1H,3H-quinazoline-2,5-dione (**4e**):

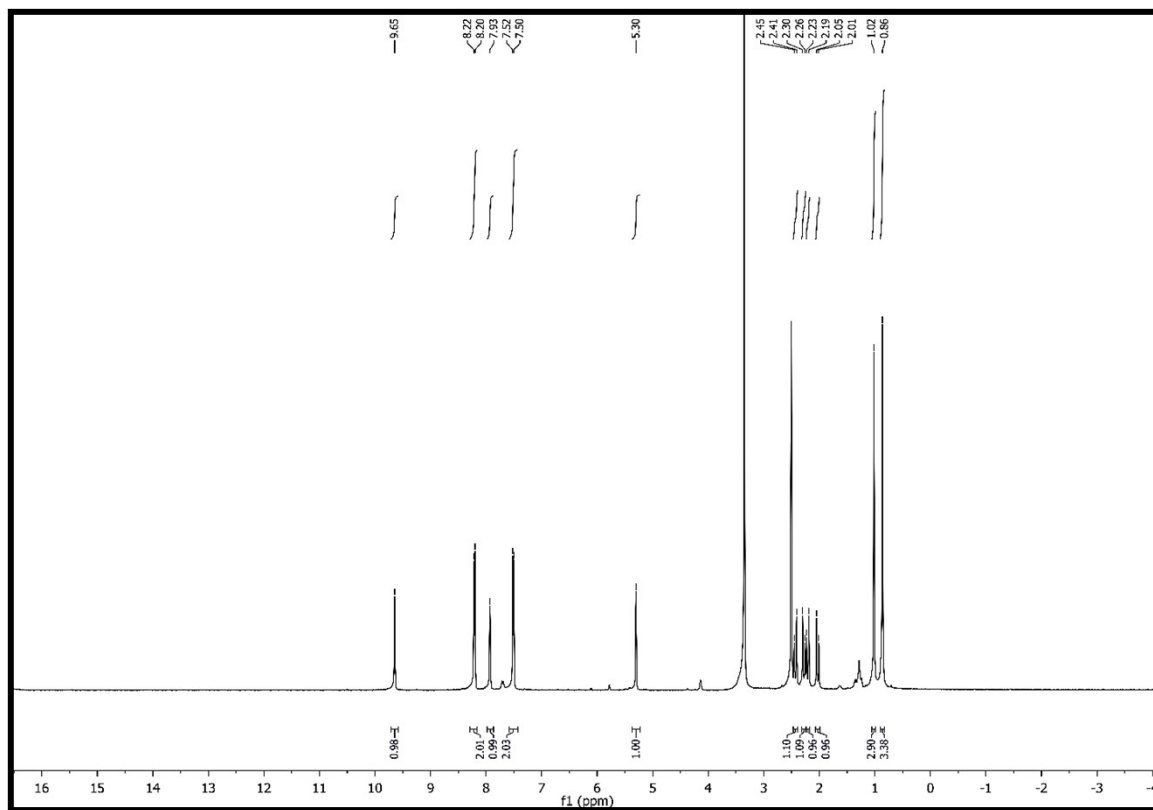

IR: 4-(phenyl)-7,7-dimethyl-4,6,7,8-tetrahydro -1H,3H-quinazoline-2,5-dione (**4f**):

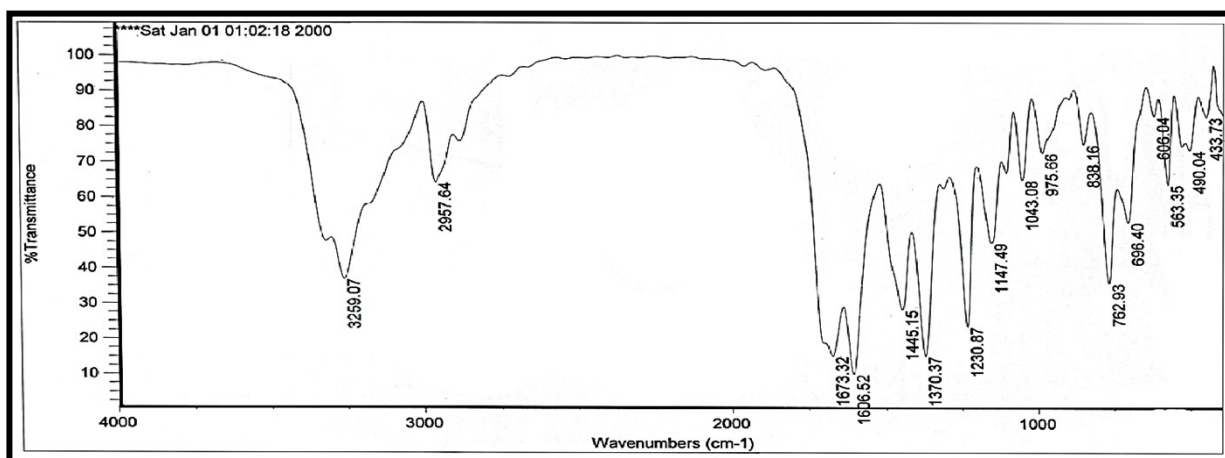

H NMR: 4-(phenyl)-7,7-dimethyl-4,6,7,8-tetrahydro -1H,3H-quinazoline-2,5-dione (**4f**):

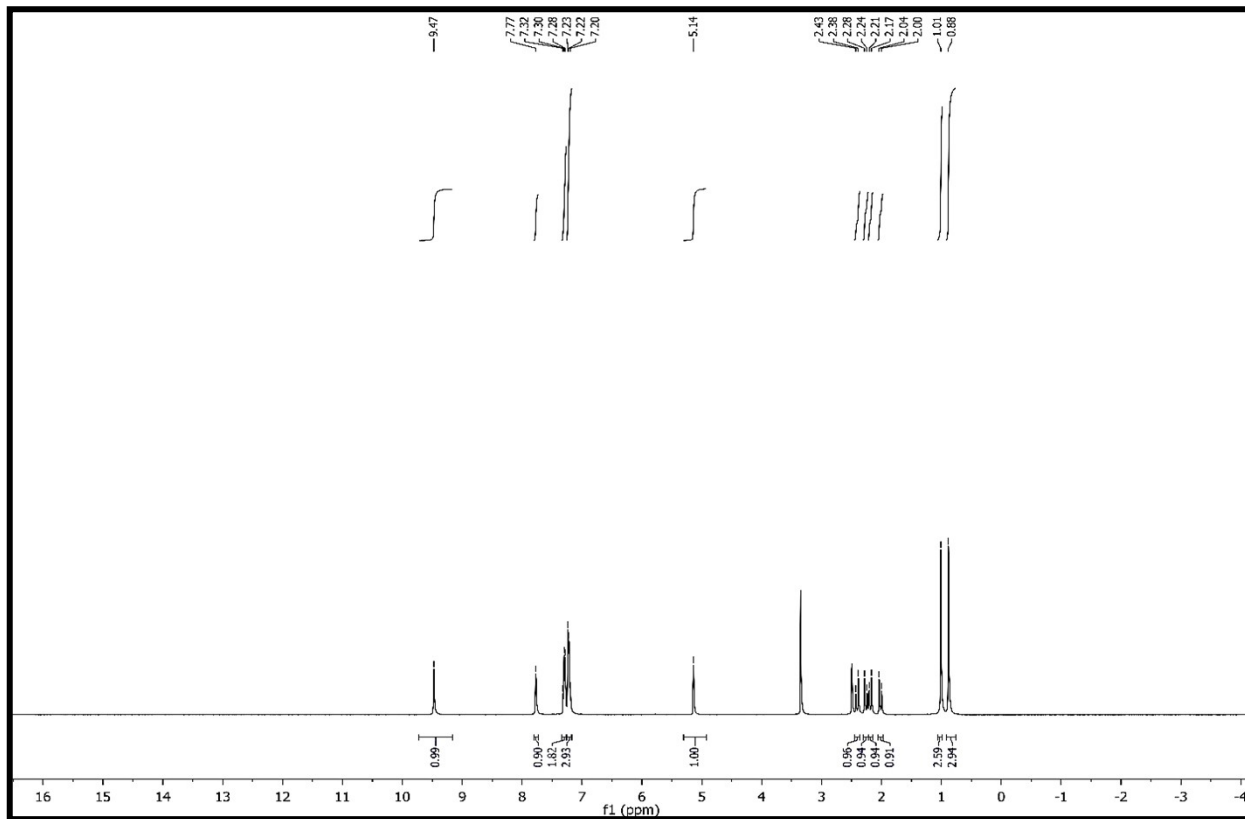

IR: 4-(2,4-dichloro-phenyl)-7,7-dimethyl-4,6,7,8-tetrahydro -1H,3H-quinazoline-2,5-dione (**4g**):

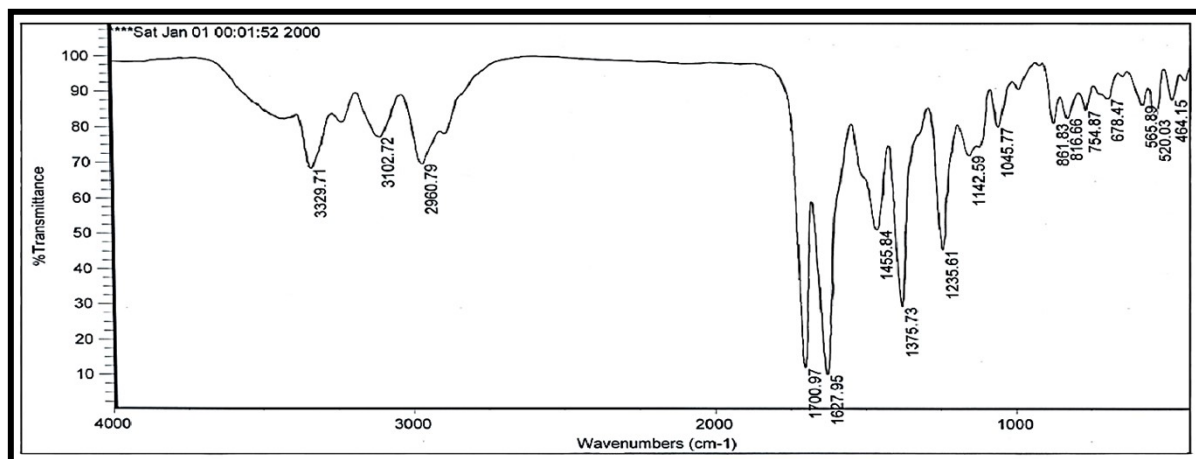

H NMR: 4-(2,4-dichloro-phenyl)-7,7-dimethyl-4,6,7,8-tetrahydro-1H,3H-quinazoline-2,5-dione (**4g**):

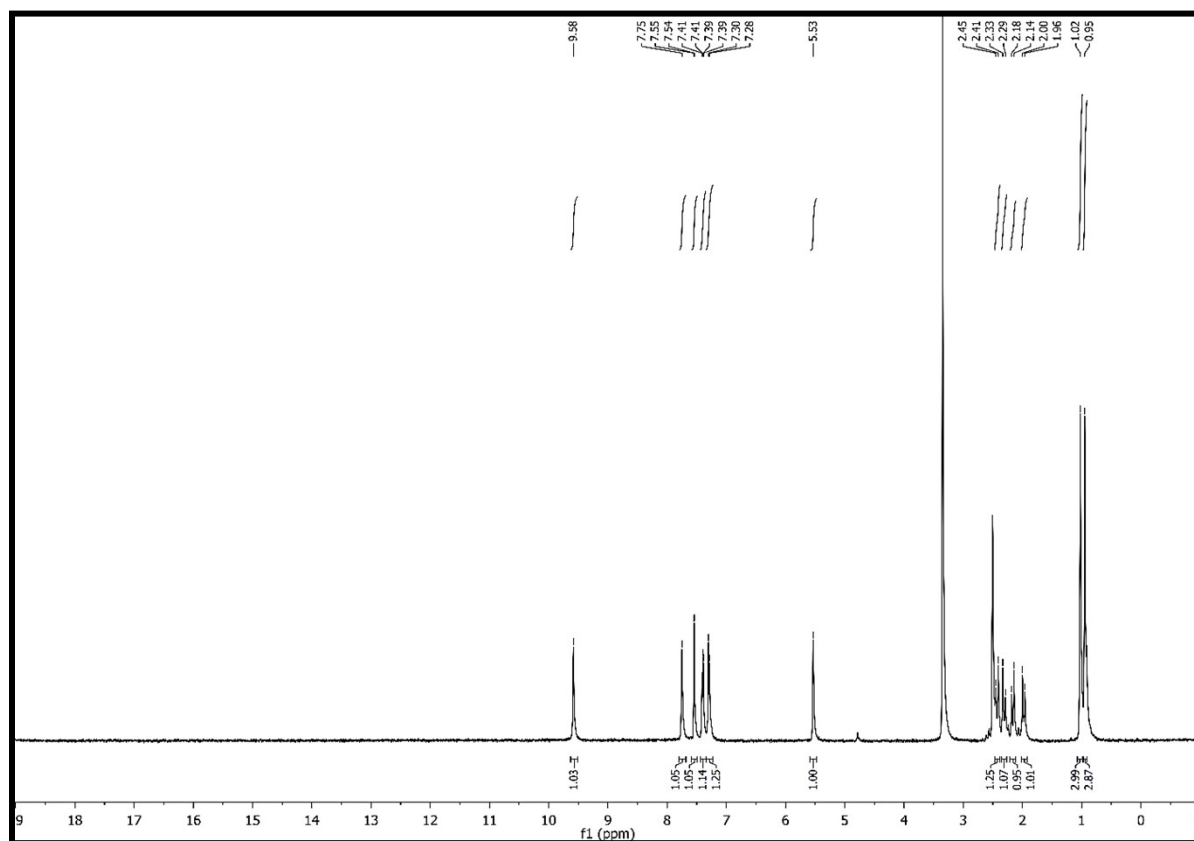

IR: 4-(4-isopropyl-phenyl)-7,7-dimethyl-4,6,7,8-tetrahydro -1H,3H-quinazoline-2,5-dione (**4h**):

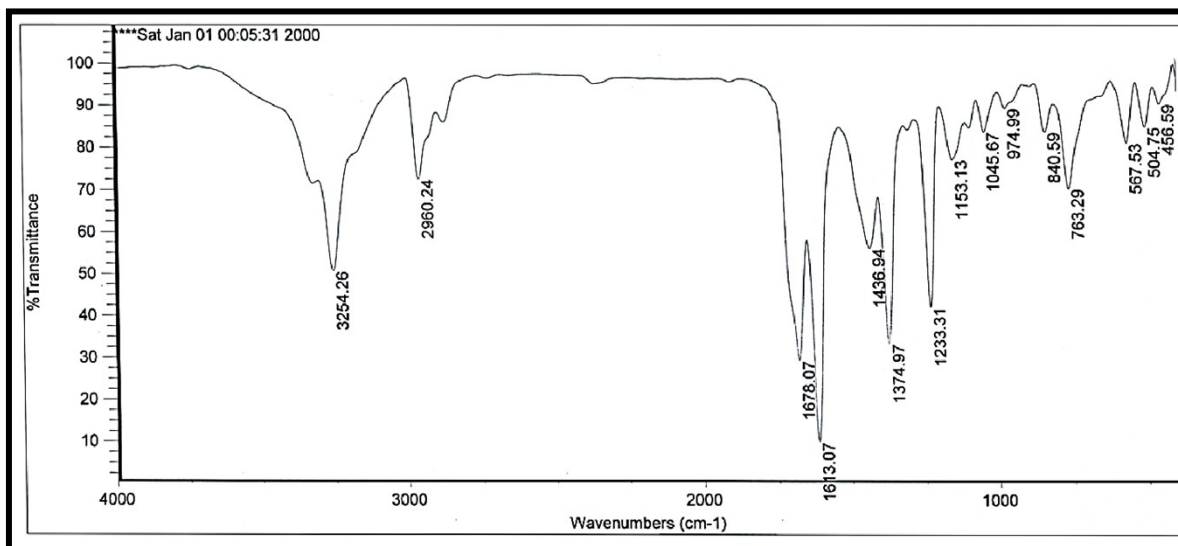



H NMR: 4-(4-isopropyl-phenyl)-7,7-dimethyl-4,6,7,8-tetrahydro -1H,3H-quinazoline-2,5-dione (**4h**):

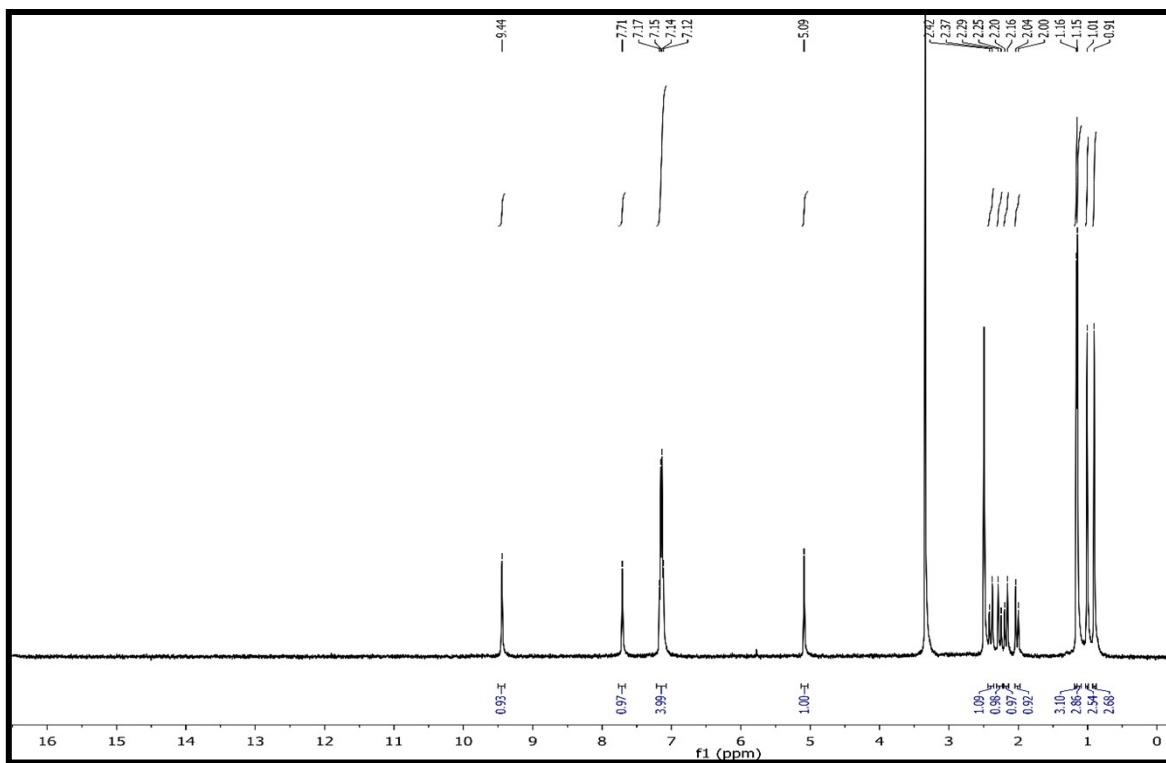

<sup>13</sup>C NMR: 4-(4-isopropyl-phenyl)-7,7-dimethyl-4,6,7,8-tetrahydro -1H,3H-quinazoline-2,5-dione (**4h**):

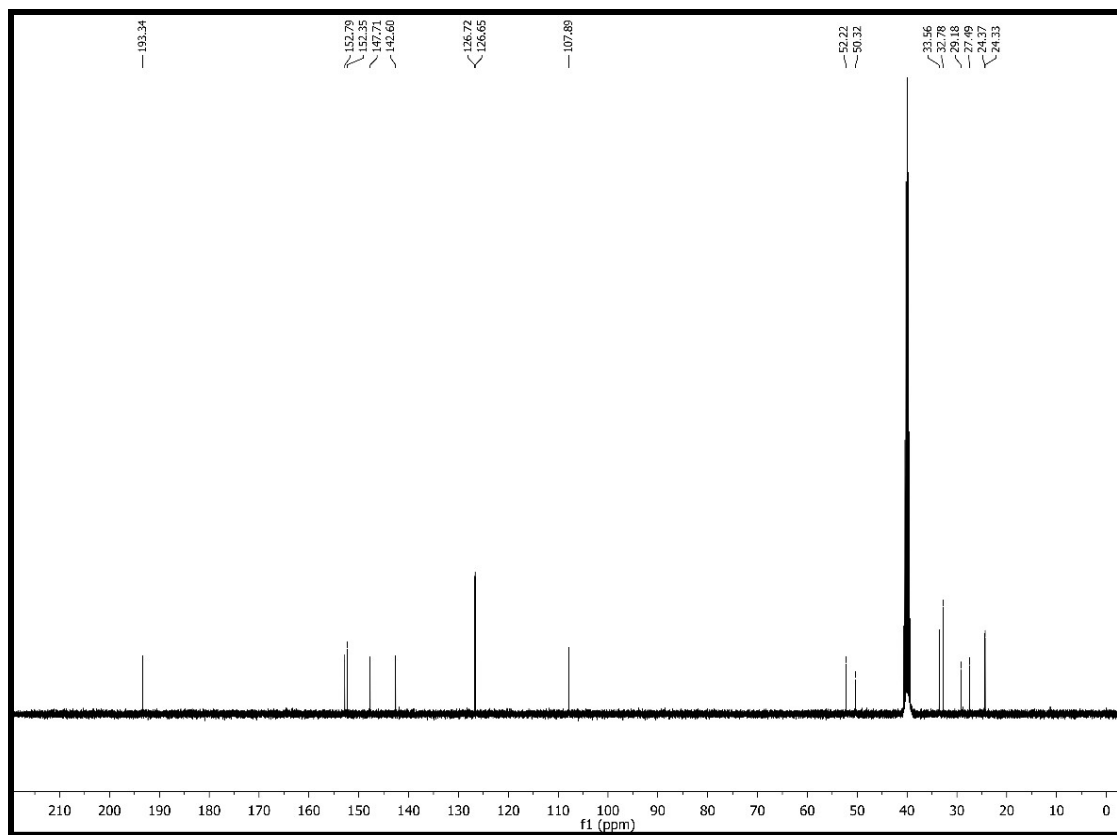

IR: 4-(2-chloro-phenyl)-7,7-dimethyl-4,6,7,8-tetrahydro -1H,3H-quinazoline-2,5-dione (4i)

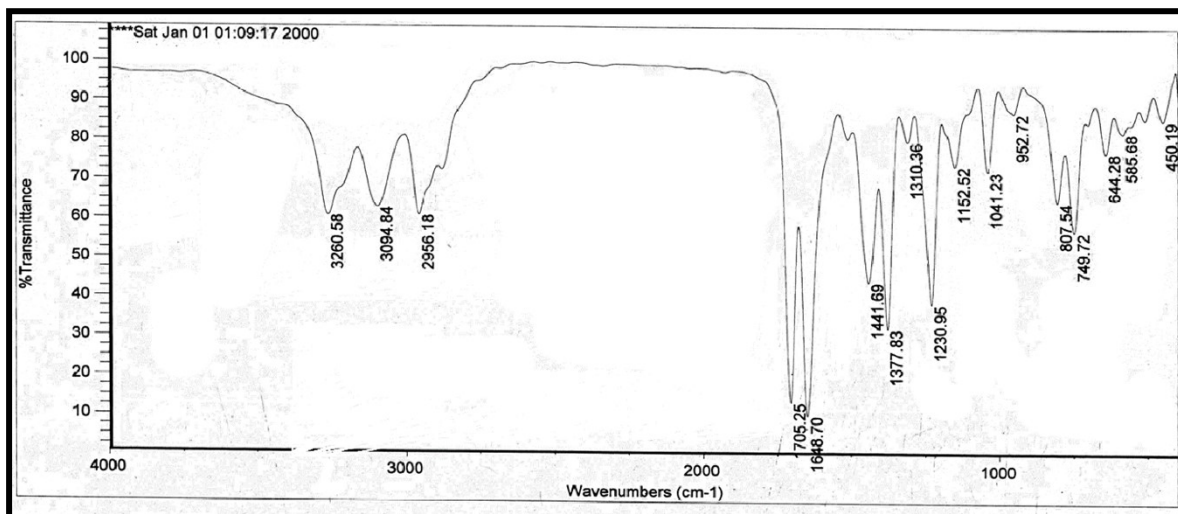

<sup>1</sup>H NMR: 4-(2-chloro-phenyl)-7,7-dimethyl-4,6,7,8-tetrahydro -1H,3H-quinazoline-2,5-dione (**4i**):

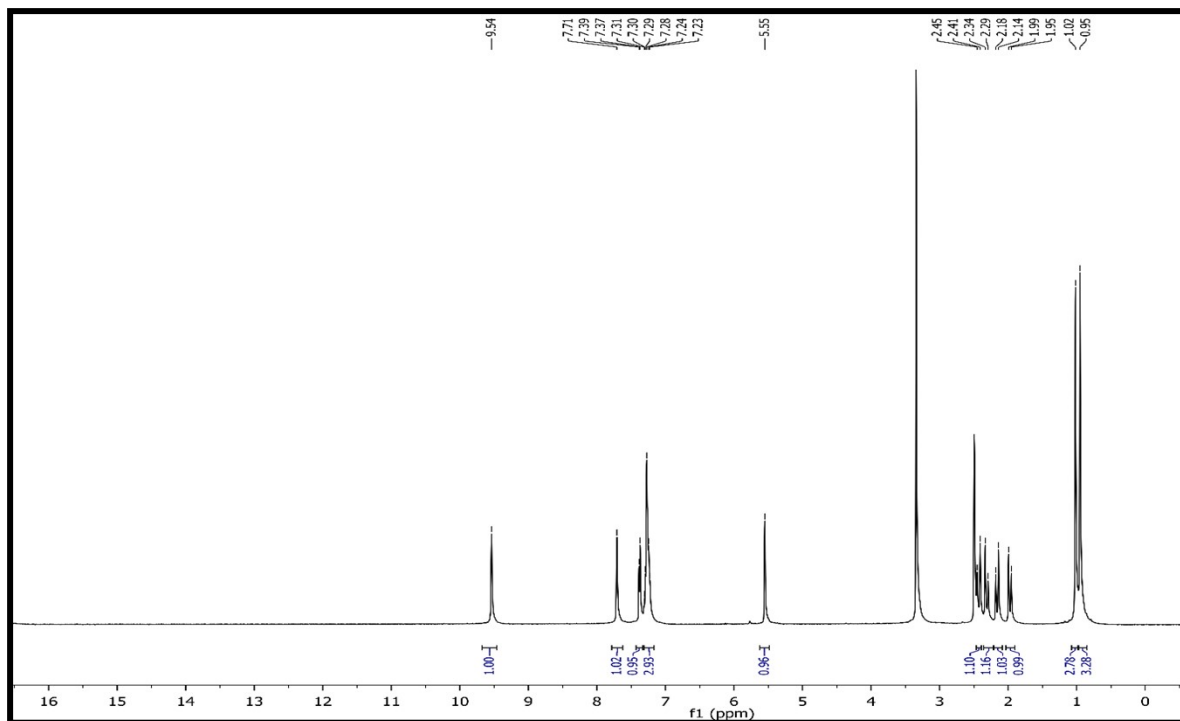

IR: 4-(4-Methoxy-phenyl)-7,7-dimethyl-4,6,7,8-tetrahydro -1H,3H-quinazoline-2,5-dione (4j):

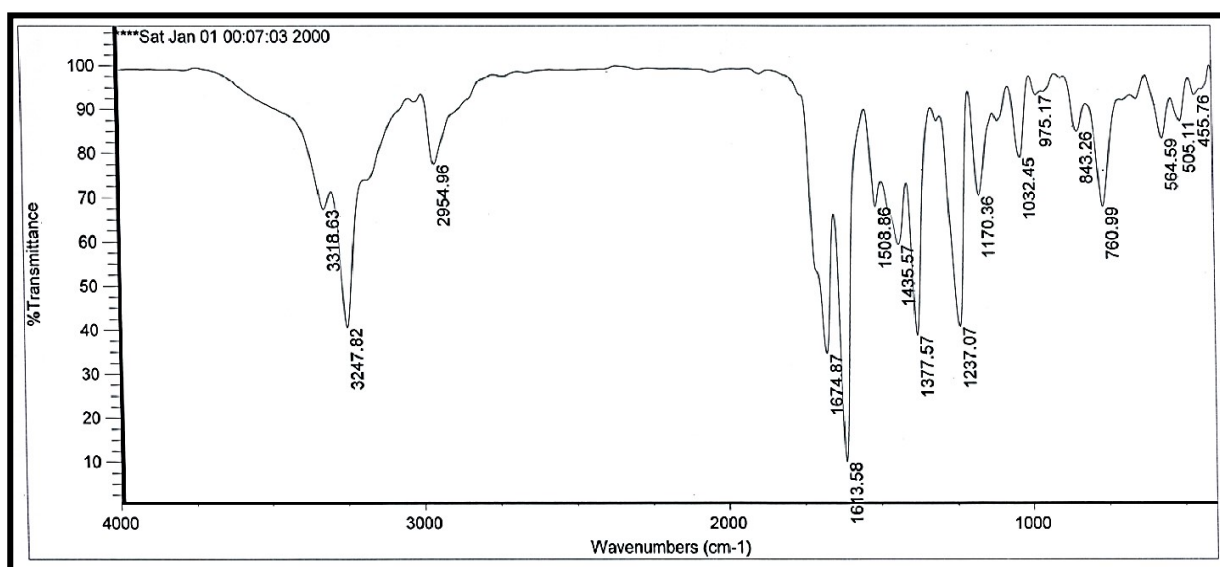

H NMR: 4-(4-Methoxy-phenyl)-7,7-dimethyl-4,6,7,8-tetrahydro -1H,3H-quinazoline-2,5-dione (4j):

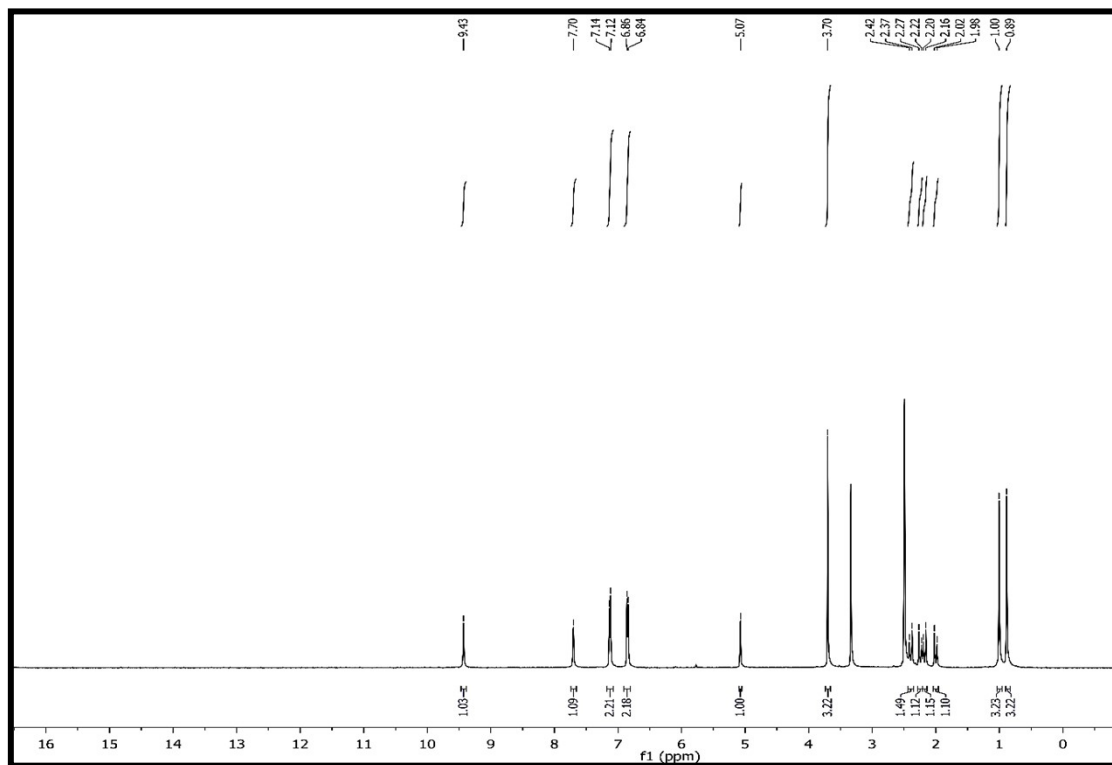

IR: 4-(4-Methyl-phenyl)-7,7-dimethyl-4,6,7,8-tetrahydro -1H,3H-quinazoline-2,5-dione (**4k**):

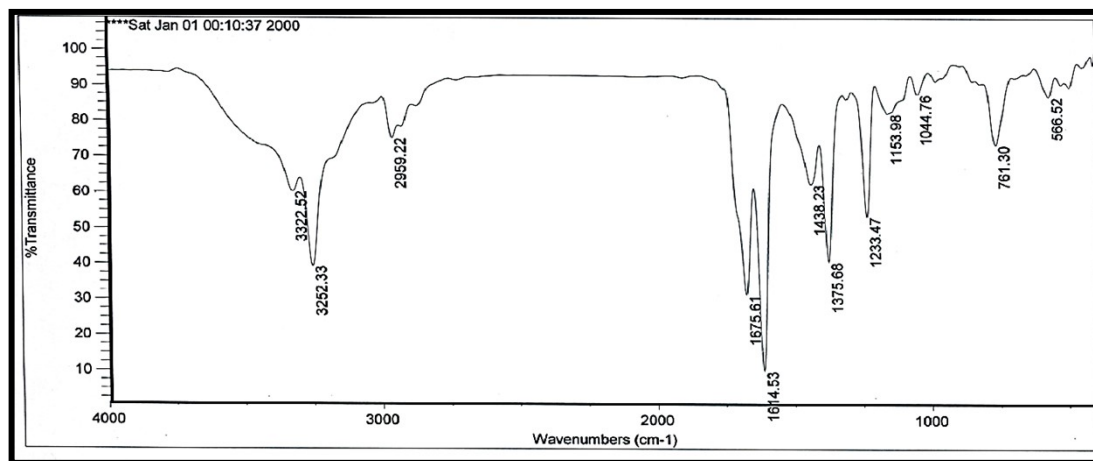

H NMR: 4-(4-Methyl-phenyl)-7,7-dimethyl-4,6,7,8-tetrahydro -1H,3H-quinazoline-2,5-dione (**4k**):

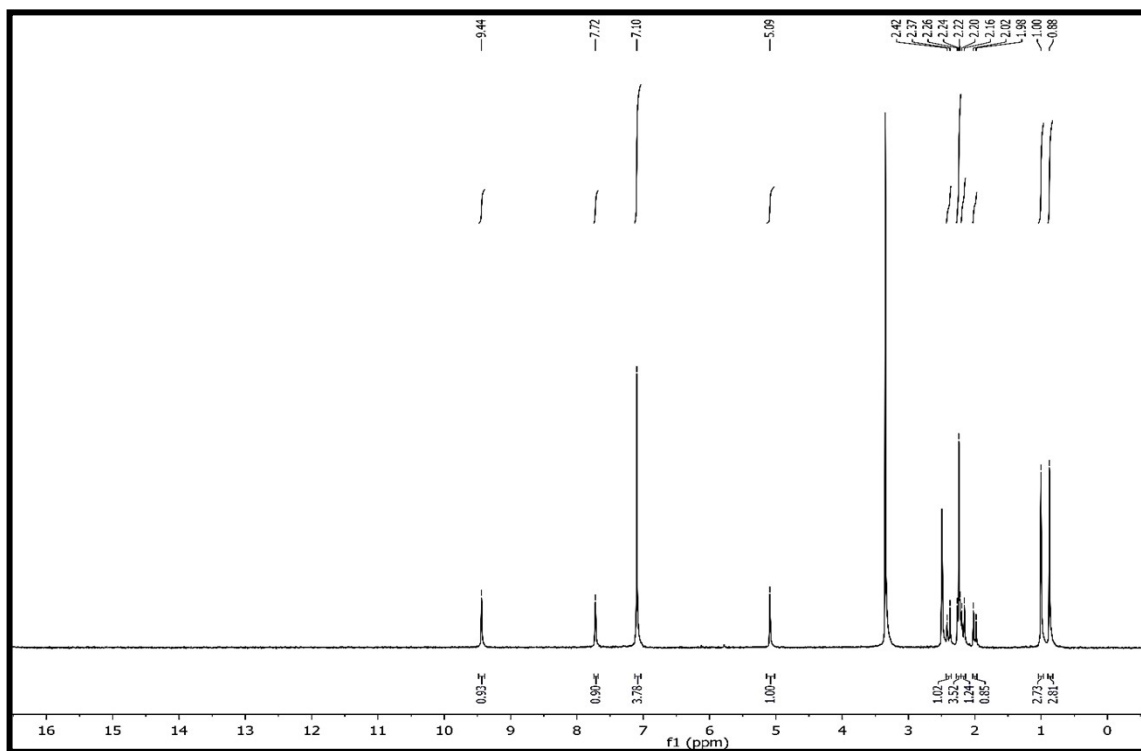



IR: 4-(3-chloro-phenyl)-7,7-dimethyl-4,6,7,8-tetrahydro -1H,3H-quinazoline-2,5-dione (**4I**):

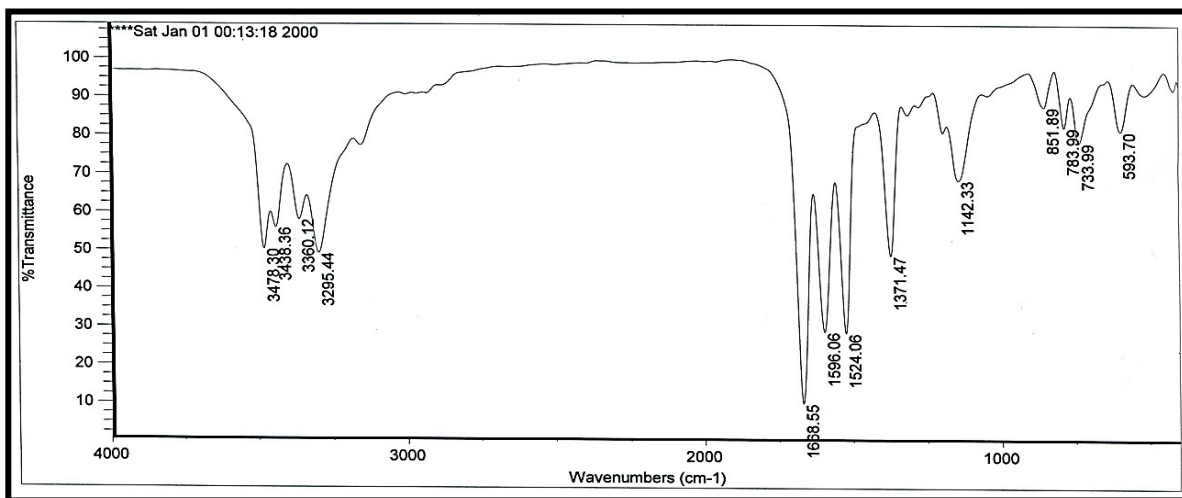

<sup>1</sup>H NMR: 4-(3-chloro-phenyl)-7,7-dimethyl-4,6,7,8-tetrahydro -1H,3H-quinazoline-2,5-dione (**4I**):

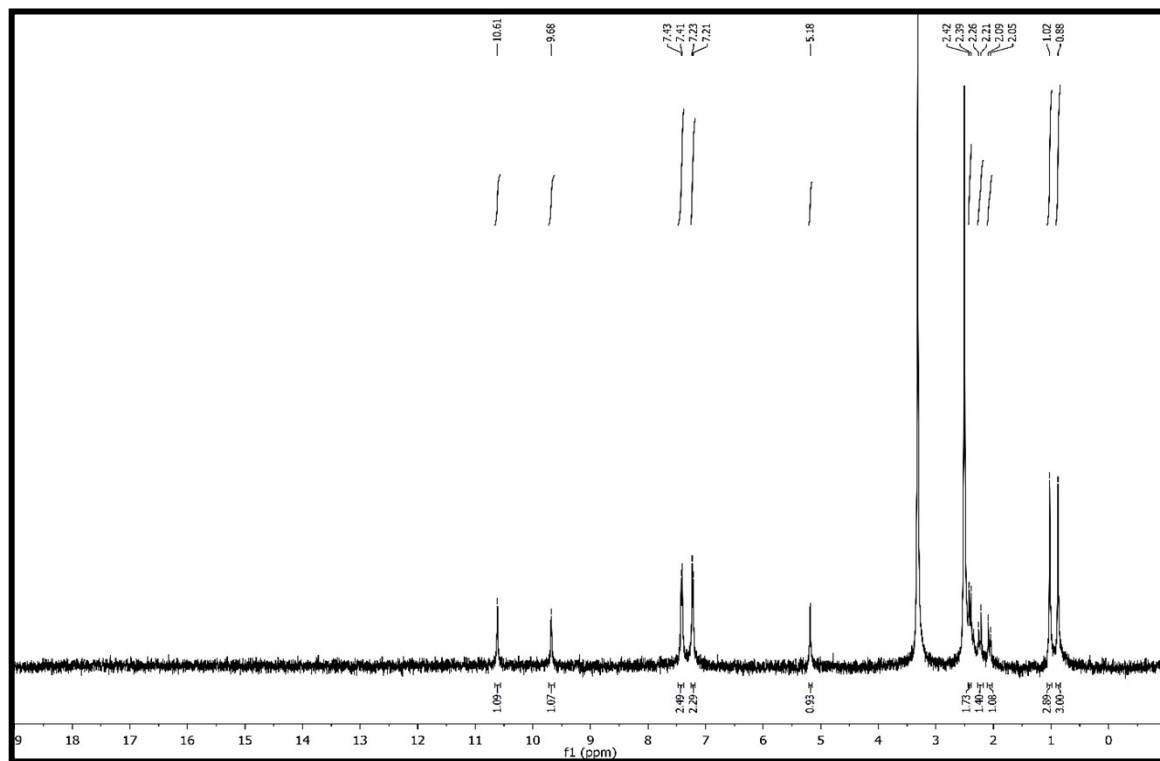

Supplement: d2ra01629j1.pdf [file d2ra01629j1.pdf]
